# Supplementary material
Source: Elsevier journal article supplement (https://www.sciencedirect.com/science/article/pii/S0085562618301912)
Supplement: mmc1 [file S0085562618301912:mmc1.xlsx]

## Sheet: Export Summary
	This document was exported from Numbers. Each table was converted to an Excel worksheet. All other objects on each Numbers sheet were placed on separate worksheets. Please be aware that formula calculations may differ in Excel.
	Numbers Sheet Name	Numbers Table Name	Excel Worksheet Name
	MatrixOutput
		Table 1	MatrixOutput
	Caption
		Table 1	Caption

## Sheet: MatrixOutput
Cotesia_abjecta|WOMIA129-11|Austria	0
Cotesia_acronyctae|HYCNE146-11|Canada	0.0731707	0
Cotesia_acuminata|GBAH0928-06|Sweden	0.0824373	0.0813008	0
Cotesia_acuminata|GBAH0932-06|Russia	0.0967742	0.0840108	0.0734767	0
Cotesia_acuminata|WOMIA133-11|Poland	0.0806452	0.0758808	0.0107527	0.0734767	0
Cotesia_ancilla|ASQSR274-11|France	0.0555556	0.0677507	0.0716846	0.0734767	0.0752688	0
Cotesia_atalantae|HYCNE169-11|Canada	0.0681004	0.0731707	0.0609319	0.0824373	0.062724	0.0519713	0
Cotesia_ayerzai|HYCNE181-11|Chile	0.0448029	0.0948509	0.0842294	0.0949821	0.0878136	0.0645161	0.0591398	0
Cotesia_bignellii|GBAH0948-06|Finland	0.09319	0.0785908	0.0609319	0.0645161	0.0573477	0.0734767	0.0716846	0.0949821	0
Cotesia_bignellii|ASQAS164-11|Germany	0.0902527	0.0765027	0.0595668	0.066787	0.0595668	0.0776173	0.0685921	0.0830325	0.0469314	0
Cotesia_cf._numen|ASQSR302-11|United_Kingdom	0.0573477	0.0731707	0.0752688	0.078853	0.078853	0.0340502	0.0573477	0.0591398	0.0752688	0.0703971	0
Cotesia_chilonis|GBMIN23886-13|	0.064	0.0894309	0.104	0.088	0.0986667	0.056	0.0666667	0.0693333	0.0906667	0.0913978	0.0586667	0
Cotesia_congregata|CNCHZ630-09|Canada	0.0448029	0.0867209	0.0878136	0.0949821	0.0913978	0.0573477	0.062724	0.046595	0.0878136	0.0902527	0.0519713	0.0693333	0
Cotesia_crambi|CGBTA439-08|Turkey	0.0806452	0.0894309	0.0949821	0.0985663	0.0913978	0.062724	0.0734767	0.0806452	0.0824373	0.0902527	0.0681004	0.0266667	0.078853	0
Cotesia_crambi|CNCHZ1162-09|Canada	0.0770609	0.0867209	0.0949821	0.0985663	0.0949821	0.0591398	0.0716846	0.078853	0.0824373	0.0902527	0.0645161	0.024	0.0752688	0.00716846	0
Cotesia_cyaniridis|HYCNE216-11|Canada	0.0623306	0.0785908	0.0921409	0.0731707	0.0921409	0.0162602	0.0542005	0.0731707	0.0840108	0.079235	0.0433604	0.0569106	0.0677507	0.0623306	0.0596206	0
Cotesia_cynthiae|GBAH0942-06|France	0.0716846	0.0948509	0.0985663	0.0913978	0.0985663	0.0591398	0.0716846	0.0770609	0.0806452	0.0938628	0.0609319	0.0266667	0.0734767	0.0412186	0.0340502	0.0596206	0
Cotesia_diversa|CNPPC872-12|Canada	0.0860215	0.0623306	0.0967742	0.105735	0.0985663	0.0770609	0.0824373	0.09319	0.0878136	0.0956679	0.0663082	0.0826667	0.0824373	0.0878136	0.0842294	0.0894309	0.0860215	0
Cotesia_electrae|HYCNE236-11|United_States	0.0409357	0.0935673	0.0906433	0.0964912	0.0906433	0.0730994	0.0730994	0.0497076	0.0906433	0.0914454	0.0789474	0.0818713	0.0380117	0.0789474	0.0818713	0.0730994	0.0906433	0.0994152	0
Cotesia_eliniae|ASCNC050-09|Canada	0.0310078	0.0795107	0.0775194	0.0910853	0.0813953	0.0542636	0.0581395	0.0387597	0.0852713	0.0898438	0.0562016	0.0660661	0.0290698	0.0852713	0.0813953	0.058104	0.0678295	0.0775194	0.0192308	0
Cotesia_enypiae|HYCNE247-11|Paratype|Canada	0.039548	0.0932203	0.0932203	0.110169	0.0988701	0.0706215	0.0706215	0.0480226	0.0988701	0.0968661	0.0706215	0.0734463	0.0225989	0.0762712	0.0734463	0.0762712	0.0762712	0.0932203	0.0292398	0.0224359	0
Cotesia_eulipis|ASQSR294-11|Norway	0.0555556	0.0623306	0.0698925	0.0716846	0.0698925	0.0322581	0.0519713	0.0573477	0.0734767	0.0649819	0.0232975	0.0506667	0.0573477	0.062724	0.0591398	0.0352304	0.0591398	0.0698925	0.0760234	0.0542636	0.0734463	0
Cotesia_eunomiae|ASQAS165-11|Belgium	0.120072	0.097561	0.0985663	0.0878136	0.100358	0.0985663	0.0860215	0.123656	0.0949821	0.0956679	0.103943	0.0986667	0.116487	0.100358	0.100358	0.0921409	0.103943	0.109319	0.122807	0.114341	0.121469	0.0967742	0
Cotesia_fiskei|HYCNE271-11|Canada	0.0487805	0.0948509	0.100271	0.119241	0.100271	0.0785908	0.0785908	0.0487805	0.105691	0.106557	0.0785908	0.0867209	0.0569106	0.0894309	0.0894309	0.0840108	0.100271	0.105691	0.0614035	0.0550459	0.059322	0.0840108	0.149051	0
Cotesia_flavipes|KINS468-10|Kenya	0.0681004	0.097561	0.0949821	0.0896057	0.09319	0.062724	0.0770609	0.0806452	0.0860215	0.0956679	0.0681004	0.0293333	0.0734767	0.0412186	0.0412186	0.0650407	0.0412186	0.0842294	0.0789474	0.0755814	0.0706215	0.0609319	0.0967742	0.100271	0
Cotesia_glomerata|GBAH2173-06|	0.0430108	0.0921409	0.0824373	0.09319	0.0860215	0.062724	0.0573477	0.00537634	0.09319	0.0866426	0.0555556	0.0666667	0.0448029	0.078853	0.0770609	0.0704607	0.0752688	0.0896057	0.0467836	0.0368217	0.0451977	0.0555556	0.120072	0.0460705	0.078853	0
Cotesia_glomerata|CGBTA030-08|Turkey	0.0430108	0.097561	0.0824373	0.0949821	0.0860215	0.062724	0.0573477	0.0125448	0.09319	0.0866426	0.0555556	0.0693333	0.0448029	0.078853	0.0770609	0.0758808	0.0752688	0.0896057	0.0526316	0.0368217	0.0508475	0.0519713	0.11828	0.0514905	0.0770609	0.00716846	0
Cotesia_griffini|HYCNE309-11|Canada	0.0780781	0.036036	0.105105	0.105105	0.0990991	0.0780781	0.0960961	0.0930931	0.0840841	0.0966767	0.0810811	0.0810811	0.0930931	0.0840841	0.0810811	0.0900901	0.0870871	0.0630631	0.0996885	0.0859107	0.0960961	0.0690691	0.117117	0.108108	0.0960961	0.0930931	0.0990991	0
Cotesia_halli|ASCNC045-09|Canada	0.0752688	0.00542005	0.0734767	0.09319	0.0716846	0.0681004	0.0663082	0.0913978	0.0842294	0.0866426	0.0734767	0.088	0.0806452	0.0896057	0.0860215	0.0758808	0.0860215	0.062724	0.0906433	0.0717054	0.0875706	0.0645161	0.09319	0.0948509	0.0896057	0.0896057	0.0896057	0.03003	0
Cotesia_hyphantriae|SMTPO8944-15|Canada	0.0734767	0.0840108	0.0878136	0.09319	0.0878136	0.078853	0.0698925	0.0824373	0.0949821	0.0938628	0.078853	0.096	0.0698925	0.0896057	0.0860215	0.0785908	0.078853	0.0896057	0.0818713	0.0717054	0.0762712	0.0681004	0.109319	0.0894309	0.0860215	0.0806452	0.0806452	0.0900901	0.0716846	0
Cotesia_inducta|ASQAS168-11|United_Kingdom	0.0555556	0.0569106	0.062724	0.0770609	0.0663082	0.0430108	0.0412186	0.0573477	0.0663082	0.0722022	0.0340502	0.0533333	0.0609319	0.0698925	0.0663082	0.0406504	0.0681004	0.0591398	0.0584795	0.0465116	0.059322	0.0322581	0.0878136	0.0677507	0.0716846	0.0537634	0.0537634	0.0570571	0.0537634	0.0681004	0
Cotesia_isolde|WOMIA111-11|Hungary	0.0394265	0.0840108	0.0824373	0.0878136	0.0860215	0.0591398	0.0645161	0.0394265	0.0824373	0.0830325	0.046595	0.0693333	0.0232975	0.078853	0.0752688	0.0704607	0.0734767	0.078853	0.0409357	0.0290698	0.039548	0.0519713	0.120072	0.0542005	0.0698925	0.0376344	0.0376344	0.0900901	0.078853	0.0734767	0.0537634	0
Cotesia_Janzen200|Host:Iscadia_argentea|ASHYD2512-10|Costa_Rica	0.0412186	0.0867209	0.0824373	0.09319	0.0860215	0.0573477	0.0609319	0.046595	0.0860215	0.0884477	0.062724	0.0613333	0.0286738	0.0770609	0.0752688	0.0704607	0.0645161	0.0842294	0.0350877	0.0232558	0.0169492	0.0573477	0.112903	0.0623306	0.0698925	0.0448029	0.0448029	0.0900901	0.0806452	0.0734767	0.0591398	0.0340502	0
Cotesia_jft02|ASWA407-08|Canada	0.0842294	0.0352304	0.0913978	0.103943	0.0878136	0.0806452	0.078853	0.0967742	0.0824373	0.0956679	0.0770609	0.0773333	0.0842294	0.0860215	0.0824373	0.0867209	0.0842294	0.062724	0.0906433	0.0813953	0.0875706	0.0698925	0.100358	0.105691	0.0878136	0.09319	0.09319	0.003003	0.0340502	0.0734767	0.0573477	0.078853	0.0824373	0
Cotesia_jft03|Host:Plutella_xyllostella|HYLEP331-08|Canada	0.0806452	0.100271	0.102151	0.0949821	0.102151	0.0770609	0.0878136	0.0842294	0.0967742	0.0956679	0.0752688	0.0773333	0.078853	0.0734767	0.0752688	0.0785908	0.062724	0.102151	0.0847953	0.0833333	0.0762712	0.078853	0.109319	0.0785908	0.0716846	0.078853	0.078853	0.111111	0.0985663	0.0913978	0.0842294	0.0752688	0.0770609	0.100358	0
Cotesia_jft06|CNCHY185-07|Canada	0.0752688	0.0596206	0.102151	0.105735	0.0949821	0.078853	0.0824373	0.0896057	0.0949821	0.0956679	0.0734767	0.072	0.0824373	0.0842294	0.0842294	0.0731707	0.0824373	0.0591398	0.0818713	0.0775194	0.0762712	0.0681004	0.109319	0.0921409	0.0842294	0.0878136	0.0878136	0.048048	0.0573477	0.078853	0.0609319	0.0752688	0.078853	0.0591398	0.102151	0
Cotesia_jft06|TTHYB423-09|Canada	0.0734767	0.0596206	0.100358	0.103943	0.09319	0.0770609	0.0806452	0.0878136	0.09319	0.0938628	0.0716846	0.072	0.0806452	0.0824373	0.0824373	0.0731707	0.0806452	0.0573477	0.0818713	0.0755814	0.0762712	0.0663082	0.107527	0.0921409	0.0824373	0.0860215	0.0860215	0.048048	0.0555556	0.0770609	0.0591398	0.0734767	0.0770609	0.0573477	0.100358	0.00179211	0
Cotesia_jft09|CNCHY183-07|Canada	0.0645161	0.0785908	0.0770609	0.0752688	0.0806452	0.016129	0.0537634	0.0663082	0.078853	0.0830325	0.0394265	0.0586667	0.0591398	0.0645161	0.0609319	0	0.0609319	0.078853	0.0730994	0.0581395	0.0762712	0.0340502	0.09319	0.0840108	0.0645161	0.0645161	0.0645161	0.0900901	0.0770609	0.0770609	0.0483871	0.0609319	0.062724	0.0860215	0.078853	0.0806452	0.078853	0
Cotesia_jft09|ASWAU507-08|Canada	0.0573477	0.0650407	0.0663082	0.0681004	0.0698925	0.00896057	0.046595	0.0591398	0.0681004	0.0722022	0.0286738	0.0506667	0.0519713	0.0573477	0.0537634	0.0135501	0.0537634	0.0734767	0.0643275	0.0542636	0.0677966	0.0268817	0.0896057	0.0758808	0.0609319	0.0573477	0.0573477	0.0750751	0.0663082	0.0734767	0.0376344	0.0537634	0.0555556	0.0752688	0.0752688	0.0734767	0.0716846	0.0107527	0
Cotesia_jucunda|BCHYM7306-15|Czech_Republic	0.0609319	0.0704607	0.0716846	0.0752688	0.0752688	0.0412186	0.0537634	0.0645161	0.0734767	0.0685921	0.0250896	0.0613333	0.0591398	0.0716846	0.0681004	0.0406504	0.0609319	0.0752688	0.0730994	0.0523256	0.0706215	0.0232975	0.103943	0.0813008	0.0716846	0.0591398	0.0591398	0.0780781	0.0716846	0.0734767	0.0340502	0.0537634	0.0609319	0.0752688	0.0806452	0.0752688	0.0734767	0.0448029	0.0358423	0
Cotesia_kazak|HYCNE346-11|Russia	0.0581395	0.0672783	0.0639535	0.0717054	0.0717054	0.00775194	0.0426357	0.0581395	0.0736434	0.078125	0.0290698	0.0600601	0.0523256	0.0639535	0.0600775	0.0183486	0.0600775	0.0717054	0.0673077	0.0503876	0.0673077	0.0310078	0.0988372	0.0764526	0.0639535	0.0562016	0.0562016	0.0790378	0.0678295	0.0794574	0.0387597	0.0523256	0.0600775	0.0813953	0.0813953	0.0813953	0.0794574	0.0155039	0.00775194	0.0368217	0
Cotesia_koebelei|GBAH0946-06|United_States	0.0501792	0.0867209	0.0716846	0.0806452	0.0752688	0.0663082	0.0663082	0.0501792	0.0752688	0.0758123	0.0591398	0.0826667	0.0519713	0.0878136	0.0842294	0.0785908	0.0734767	0.09319	0.0526316	0.0387597	0.0564972	0.0609319	0.11828	0.0623306	0.0878136	0.0483871	0.0483871	0.0930931	0.0842294	0.0716846	0.0591398	0.0430108	0.0537634	0.0842294	0.078853	0.0913978	0.0896057	0.0716846	0.0645161	0.0573477	0.0600775	0
Cotesia_laeviceps|Paratype|HYCNE372-11|Canada	0.0780781	0.036036	0.105105	0.105105	0.0990991	0.0780781	0.0960961	0.0930931	0.0840841	0.0966767	0.0810811	0.0810811	0.0930931	0.0840841	0.0810811	0.0900901	0.0870871	0.0630631	0.0996885	0.0859107	0.0960961	0.0690691	0.117117	0.108108	0.0960961	0.0930931	0.0990991	0	0.03003	0.0900901	0.0570571	0.0900901	0.0900901	0.003003	0.111111	0.048048	0.048048	0.0900901	0.0750751	0.0780781	0.0790378	0.0930931	0
Cotesia_lunata|HYCNE380-11|Canada	0.0448029	0.0840108	0.0878136	0.102151	0.0949821	0.0681004	0.0663082	0.046595	0.0949821	0.099278	0.062724	0.0666667	0.0322581	0.0770609	0.0752688	0.0758808	0.0734767	0.0896057	0.0380117	0.0271318	0.0282486	0.0681004	0.116487	0.0542005	0.0770609	0.0448029	0.0448029	0.0900901	0.0806452	0.0860215	0.0609319	0.0340502	0.0268817	0.0842294	0.0824373	0.0896057	0.0878136	0.0698925	0.062724	0.0663082	0.0620155	0.0555556	0.0900901	0
Cotesia_lyciae|HYCNE384-11|Canada	0.0367232	0.0903955	0.0960452	0.101695	0.0960452	0.0649718	0.0649718	0.039548	0.101695	0.0968661	0.0706215	0.0734463	0.0338983	0.0734463	0.0734463	0.0706215	0.0762712	0.0932203	0.0321637	0.025641	0.0254237	0.0734463	0.124294	0.0480226	0.0762712	0.0367232	0.0423729	0.0930931	0.0847458	0.0734463	0.0564972	0.0367232	0.0254237	0.0932203	0.0706215	0.079096	0.079096	0.0706215	0.0621469	0.0706215	0.0608974	0.0536723	0.0930931	0.0310734	0
Cotesia_lycophron|WOMIA134-11|Spain	0.0716846	0.0867209	0.0949821	0.0985663	0.0949821	0.0591398	0.0681004	0.0698925	0.0860215	0.0920578	0.0645161	0.0293333	0.0770609	0.0394265	0.0358423	0.0596206	0.0304659	0.0824373	0.0789474	0.0717054	0.0706215	0.0555556	0.103943	0.0867209	0.046595	0.0681004	0.0681004	0.0780781	0.0824373	0.0806452	0.062724	0.0770609	0.0716846	0.0806452	0.0698925	0.0806452	0.078853	0.0645161	0.0537634	0.062724	0.0600775	0.0770609	0.0780781	0.0734767	0.0762712	0
Cotesia_maculithorax|ASQAS182-11|United_Kingdom	0.0681004	0.0650407	0.0752688	0.0806452	0.078853	0.0394265	0.0555556	0.0698925	0.078853	0.0758123	0.0340502	0.0613333	0.0645161	0.078853	0.0752688	0.0433604	0.0698925	0.0734767	0.0760234	0.0620155	0.0677966	0.0394265	0.0896057	0.0758808	0.0770609	0.0663082	0.0663082	0.0720721	0.0645161	0.078853	0.0340502	0.0609319	0.0698925	0.0752688	0.0716846	0.0663082	0.0645161	0.0483871	0.0376344	0.0448029	0.0368217	0.0663082	0.0720721	0.0734767	0.0677966	0.0698925	0
Cotesia_marginiventris|ASQAS169-11|United_States	0.0430108	0.0785908	0.0824373	0.0896057	0.0824373	0.0519713	0.0591398	0.046595	0.0878136	0.0830325	0.0430108	0.0613333	0.0519713	0.0770609	0.0734767	0.0596206	0.0716846	0.0806452	0.0584795	0.0484496	0.0564972	0.0448029	0.112903	0.0569106	0.0734767	0.0430108	0.0430108	0.0870871	0.078853	0.0734767	0.0483871	0.0448029	0.0483871	0.0824373	0.0806452	0.0752688	0.0734767	0.0537634	0.046595	0.0537634	0.0484496	0.0573477	0.0870871	0.0519713	0.0536723	0.0609319	0.0573477	0
Cotesia_marginiventris|SYC7726-14|French_Polynesia	0.0412186	0.0785908	0.0806452	0.0878136	0.0806452	0.0501792	0.0573477	0.0448029	0.0860215	0.0812274	0.0412186	0.0613333	0.0501792	0.0752688	0.0716846	0.0596206	0.0698925	0.0824373	0.0584795	0.0465116	0.0564972	0.0430108	0.111111	0.0569106	0.0716846	0.0412186	0.0412186	0.0870871	0.0806452	0.0716846	0.046595	0.0430108	0.046595	0.0842294	0.078853	0.0770609	0.0752688	0.0519713	0.0448029	0.0519713	0.0465116	0.0555556	0.0870871	0.0501792	0.0536723	0.062724	0.0555556	0.00179211	0
Cotesia_melanoscela|HYCNE408-11|Canada	0.0649718	0.0903955	0.10452	0.0988701	0.10452	0.0706215	0.0706215	0.0649718	0.101695	0.0997151	0.0649718	0.0762712	0.0677966	0.079096	0.079096	0.0762712	0.0847458	0.0988701	0.0730994	0.0576923	0.0677966	0.0734463	0.118644	0.079096	0.079096	0.0621469	0.0621469	0.0990991	0.0903955	0.101695	0.0621469	0.059322	0.0762712	0.0960452	0.079096	0.0903955	0.0903955	0.0762712	0.0677966	0.0706215	0.0608974	0.0819209	0.0990991	0.059322	0.059322	0.0734463	0.0762712	0.0706215	0.0706215
Cotesia_melitaearum|GBAH0933-06|Italy	0.0716846	0.0921409	0.0985663	0.0949821	0.0985663	0.062724	0.0734767	0.0734767	0.078853	0.0902527	0.0645161	0.0373333	0.0734767	0.0483871	0.0412186	0.0650407	0.0179211	0.0824373	0.0906433	0.0717054	0.0762712	0.0591398	0.105735	0.0921409	0.0448029	0.0716846	0.0716846	0.0840841	0.0842294	0.0770609	0.0663082	0.0734767	0.0681004	0.0824373	0.062724	0.0734767	0.0716846	0.0645161	0.0573477	0.0573477	0.0639535	0.0734767	0.0840841	0.0770609	0.0819209	0.0268817	0.0734767	0.0716846	0.0698925
Cotesia_melitaearum|CGBTA450-08|Turkey	0.0698925	0.0867209	0.100358	0.09319	0.100358	0.0609319	0.0716846	0.0752688	0.0770609	0.0902527	0.0663082	0.0373333	0.0716846	0.0501792	0.0430108	0.0596206	0.0197133	0.0806452	0.0847953	0.0697674	0.0706215	0.0573477	0.103943	0.0921409	0.046595	0.0734767	0.0734767	0.0780781	0.0824373	0.0752688	0.0645161	0.0752688	0.0663082	0.0806452	0.0645161	0.0716846	0.0698925	0.062724	0.0555556	0.0555556	0.0620155	0.0752688	0.0780781	0.078853	0.0762712	0.0286738	0.0716846	0.0734767	0.0716846
Cotesia_melitaearum|ASQSR287-11|France	0.0752688	0.0921409	0.0949821	0.09319	0.0949821	0.0663082	0.0681004	0.0734767	0.078853	0.0956679	0.0681004	0.04	0.0770609	0.0501792	0.0430108	0.0677507	0.0197133	0.0860215	0.0935673	0.0736434	0.079096	0.0591398	0.103943	0.0948509	0.0483871	0.0716846	0.0681004	0.0870871	0.0860215	0.0806452	0.0698925	0.0770609	0.0716846	0.0860215	0.062724	0.0806452	0.078853	0.0681004	0.0609319	0.0645161	0.0658915	0.0770609	0.0870871	0.0806452	0.0847458	0.0322581	0.0770609	0.0752688	0.0734767
Cotesia_nonagriae|GBMIN23885-13|	0.08	0.097561	0.0986667	0.088	0.0933333	0.0693333	0.0853333	0.0853333	0.0853333	0.0913978	0.0666667	0.0293333	0.0746667	0.04	0.0426667	0.0704607	0.0506667	0.0933333	0.0877193	0.0840841	0.079096	0.0586667	0.106667	0.0921409	0.0293333	0.0826667	0.0853333	0.0930931	0.096	0.104	0.0613333	0.08	0.0773333	0.0853333	0.0826667	0.08	0.08	0.072	0.064	0.0746667	0.0750751	0.0933333	0.0930931	0.072	0.0903955	0.048	0.0693333	0.0773333	0.0773333
Cotesia_obscuricornis|GBAH3172-07|	0.0677507	0.102981	0.0921409	0.0894309	0.0921409	0.0894309	0.0785908	0.0596206	0.0921409	0.0901639	0.0785908	0.0921409	0.0731707	0.097561	0.0948509	0.0948509	0.0921409	0.113821	0.0730994	0.058104	0.0734463	0.0867209	0.127371	0.0785908	0.0948509	0.0569106	0.0623306	0.123123	0.105691	0.0948509	0.0758808	0.0731707	0.0731707	0.116531	0.0948509	0.097561	0.097561	0.0948509	0.0867209	0.0867209	0.0825688	0.0677507	0.123123	0.0758808	0.0762712	0.0921409	0.0813008	0.0569106	0.0569106
Cotesia_ofella|WOMIA115-11|Hungary	0.0860215	0.0650407	0.0878136	0.105735	0.0913978	0.0698925	0.0806452	0.0860215	0.0842294	0.099278	0.0734767	0.088	0.0824373	0.0896057	0.0860215	0.0758808	0.0806452	0.0412186	0.102339	0.0755814	0.0988701	0.0681004	0.0985663	0.113821	0.0913978	0.0824373	0.078853	0.0600601	0.0573477	0.0806452	0.0609319	0.0824373	0.0806452	0.0573477	0.0949821	0.062724	0.0609319	0.0681004	0.0663082	0.0734767	0.0678295	0.0878136	0.0600601	0.0860215	0.0988701	0.0752688	0.0734767	0.078853	0.0806452
Cotesia_orobenae|CGBTB717-09|Turkey	0.0358423	0.0948509	0.0806452	0.0913978	0.0842294	0.0537634	0.062724	0.0376344	0.0896057	0.0884477	0.046595	0.0586667	0.0340502	0.0770609	0.0734767	0.0677507	0.0681004	0.0878136	0.0497076	0.0310078	0.0423729	0.0537634	0.111111	0.0514905	0.0734767	0.0358423	0.0322581	0.105105	0.0824373	0.0752688	0.0501792	0.0340502	0.0376344	0.09319	0.078853	0.0842294	0.0824373	0.0591398	0.0519713	0.0591398	0.0523256	0.046595	0.105105	0.0412186	0.039548	0.0716846	0.0573477	0.0376344	0.0358423
Cotesia_orobenae|SAHYM130-10|Canada	0.0376344	0.0894309	0.078853	0.0860215	0.0824373	0.0483871	0.0573477	0.0358423	0.0878136	0.0830325	0.0412186	0.0586667	0.0322581	0.0752688	0.0716846	0.0623306	0.0645161	0.0860215	0.0497076	0.0329457	0.0423729	0.0483871	0.112903	0.0514905	0.0716846	0.0340502	0.0340502	0.105105	0.0806452	0.0698925	0.0519713	0.0322581	0.0358423	0.0913978	0.0770609	0.0860215	0.0842294	0.0537634	0.046595	0.0537634	0.0465116	0.0448029	0.105105	0.0394265	0.039548	0.0698925	0.0555556	0.0322581	0.0304659
Cotesia_parastichtidis|ASWA947-08|Canada	0.0663082	0.0731707	0.0716846	0.0878136	0.0752688	0.0483871	0.0573477	0.0698925	0.0806452	0.0740072	0.0448029	0.0693333	0.0645161	0.0824373	0.078853	0.0596206	0.0752688	0.0716846	0.0789474	0.0620155	0.0706215	0.0394265	0.0949821	0.0894309	0.0806452	0.0663082	0.0663082	0.0720721	0.0681004	0.0752688	0.0358423	0.0609319	0.0591398	0.0698925	0.078853	0.0752688	0.0734767	0.0537634	0.0430108	0.0448029	0.0484496	0.0716846	0.0720721	0.0752688	0.0734463	0.0734767	0.046595	0.0591398	0.0573477
Cotesia_phobetri|HYCNE449-11|United_States	0.0480226	0.0988701	0.0960452	0.107345	0.101695	0.0762712	0.0762712	0.0564972	0.0903955	0.0968661	0.0762712	0.0734463	0.0338983	0.0649718	0.0677966	0.0819209	0.0762712	0.0932203	0.0321637	0.0320513	0.0254237	0.0847458	0.118644	0.0649718	0.0706215	0.0536723	0.059322	0.0960961	0.0932203	0.0903955	0.0677966	0.0423729	0.0310734	0.0903955	0.0819209	0.0847458	0.0847458	0.0819209	0.0734463	0.0819209	0.0737179	0.059322	0.0960961	0.0310734	0.0338983	0.0762712	0.0734463	0.0649718	0.0649718
Cotesia_pieridis|ASQSR300-11|Greece	0.0430108	0.0867209	0.0860215	0.0967742	0.0896057	0.0645161	0.0591398	0.0448029	0.0949821	0.0974729	0.0591398	0.064	0.0483871	0.0860215	0.0824373	0.0650407	0.0770609	0.09319	0.0438596	0.0310078	0.0423729	0.0609319	0.121864	0.0542005	0.078853	0.0412186	0.0412186	0.0840841	0.0842294	0.0752688	0.0537634	0.0412186	0.0483871	0.0842294	0.0878136	0.0896057	0.0878136	0.0663082	0.062724	0.0609319	0.0562016	0.0519713	0.0840841	0.0483871	0.039548	0.0734767	0.062724	0.0483871	0.046595
Cotesia_pilicornis|WOMIC628-10|Sweden	0.0519713	0.0677507	0.0698925	0.0770609	0.0734767	0.0322581	0.0483871	0.0573477	0.0698925	0.0649819	0.0125448	0.064	0.0501792	0.0698925	0.0663082	0.0406504	0.062724	0.0663082	0.0672515	0.0465116	0.0649718	0.0179211	0.105735	0.0785908	0.0698925	0.0555556	0.0555556	0.0690691	0.0663082	0.0716846	0.0322581	0.046595	0.0537634	0.0716846	0.0824373	0.0716846	0.0698925	0.0376344	0.0268817	0.0197133	0.0271318	0.0573477	0.0690691	0.0609319	0.0649718	0.062724	0.0394265	0.0483871	0.046595
Cotesia_plutellae|NZMG256-11|New_Zealand	0.0645161	0.0921409	0.0967742	0.0967742	0.09319	0.0573477	0.0663082	0.0681004	0.0878136	0.0938628	0.062724	0.0266667	0.0716846	0.0430108	0.0394265	0.0596206	0.0232975	0.0824373	0.0818713	0.0658915	0.0706215	0.0537634	0.103943	0.0921409	0.0412186	0.0663082	0.0663082	0.0840841	0.0860215	0.078853	0.0645161	0.0716846	0.0645161	0.0824373	0.0663082	0.0752688	0.0734767	0.0591398	0.0519713	0.062724	0.0542636	0.0770609	0.0840841	0.0752688	0.0762712	0.0286738	0.0681004	0.0645161	0.062724
Cotesia_rubecula|HYCNE484-11|France	0.0448029	0.0840108	0.0878136	0.102151	0.0949821	0.0681004	0.0663082	0.046595	0.0949821	0.099278	0.062724	0.0666667	0.0322581	0.0770609	0.0752688	0.0758808	0.0734767	0.0896057	0.0380117	0.0271318	0.0282486	0.0681004	0.116487	0.0542005	0.0770609	0.0448029	0.0448029	0.0900901	0.0806452	0.0860215	0.0609319	0.0340502	0.0268817	0.0842294	0.0824373	0.0896057	0.0878136	0.0698925	0.062724	0.0663082	0.0620155	0.0555556	0.0900901	0	0.0310734	0.0734767	0.0734767	0.0519713	0.0501792
Cotesia_ruficrus|ex_Mythimna_impura|ASQSP562-08|United_Kingdom	0.0806452	0.0894309	0.0949821	0.0878136	0.0913978	0.0698925	0.078853	0.0860215	0.100358	0.108303	0.0752688	0.064	0.0878136	0.0716846	0.0716846	0.0758808	0.0519713	0.102151	0.0935673	0.0794574	0.0903955	0.0681004	0.102151	0.111111	0.0663082	0.0842294	0.0824373	0.0930931	0.0842294	0.0806452	0.0698925	0.0824373	0.0752688	0.0896057	0.0770609	0.0967742	0.0949821	0.0716846	0.0609319	0.0716846	0.0678295	0.0896057	0.0930931	0.0860215	0.0932203	0.0519713	0.078853	0.0716846	0.0698925
Cotesia_ruficrus|CNCBA897-10|New_Zealand	0.0734767	0.0840108	0.0896057	0.0878136	0.0860215	0.0537634	0.0663082	0.0698925	0.0913978	0.0974729	0.062724	0.0533333	0.0752688	0.062724	0.062724	0.0650407	0.0448029	0.0896057	0.0906433	0.0658915	0.0762712	0.0555556	0.102151	0.100271	0.0519713	0.0681004	0.0663082	0.0900901	0.078853	0.0770609	0.0681004	0.0734767	0.0681004	0.0860215	0.0734767	0.0860215	0.0842294	0.062724	0.0519713	0.062724	0.0503876	0.0842294	0.0900901	0.0824373	0.0875706	0.046595	0.0645161	0.0645161	0.062724
Cotesia_ruficrus|MAMTK483-12|Pakistan	0.0734767	0.0840108	0.0896057	0.0878136	0.0860215	0.0537634	0.0663082	0.0698925	0.0913978	0.0974729	0.062724	0.0533333	0.0752688	0.062724	0.062724	0.0650407	0.0448029	0.0896057	0.0906433	0.0658915	0.0762712	0.0555556	0.102151	0.100271	0.0519713	0.0681004	0.0663082	0.0900901	0.078853	0.0770609	0.0681004	0.0734767	0.0681004	0.0860215	0.0734767	0.0860215	0.0842294	0.062724	0.0519713	0.062724	0.0503876	0.0842294	0.0900901	0.0824373	0.0875706	0.046595	0.0645161	0.0645161	0.062724
Cotesia_ruficrus|GMEGA138-14|Egypt	0.0770609	0.0948509	0.100358	0.0896057	0.0967742	0.0698925	0.0824373	0.0842294	0.0967742	0.099278	0.0698925	0.056	0.0806452	0.0698925	0.0698925	0.0731707	0.0501792	0.0967742	0.0877193	0.0775194	0.0819209	0.0663082	0.102151	0.105691	0.062724	0.0824373	0.0806452	0.0930931	0.0913978	0.0842294	0.0752688	0.0734767	0.0716846	0.0896057	0.0698925	0.0913978	0.0896057	0.0716846	0.0609319	0.0698925	0.0678295	0.0842294	0.0930931	0.0896057	0.0875706	0.0537634	0.0752688	0.0752688	0.0734767
Cotesia_rufocoxalis|CNCHX262-09|United_States	0.078853	0.0704607	0.100358	0.0985663	0.0949821	0.0860215	0.0824373	0.0878136	0.0878136	0.101083	0.0752688	0.08	0.0716846	0.0860215	0.0824373	0.0867209	0.0734767	0.0609319	0.0789474	0.0717054	0.0706215	0.0752688	0.107527	0.0921409	0.0824373	0.0842294	0.0842294	0.0660661	0.062724	0.0716846	0.0681004	0.0734767	0.0716846	0.062724	0.0949821	0.0555556	0.0537634	0.0878136	0.0806452	0.0752688	0.0852713	0.0896057	0.0660661	0.078853	0.0706215	0.0734767	0.0752688	0.0716846	0.0734767
Cotesia_salebrosa|SSJAE3068-13|Canada	0.0457875	0.0616246	0.0677656	0.0769231	0.0714286	0.029304	0.0421245	0.0531136	0.0732601	0.0701107	0.0274725	0.0606061	0.047619	0.0695971	0.0659341	0.0364146	0.0641026	0.0732601	0.0614035	0.0406977	0.0584795	0.021978	0.0970696	0.0728291	0.0677656	0.0512821	0.0512821	0.0685358	0.0604396	0.0714286	0.029304	0.0457875	0.0512821	0.0695971	0.0842491	0.0695971	0.0677656	0.0347985	0.0238095	0.0274725	0.0232558	0.0549451	0.0685358	0.0567766	0.0584795	0.0604396	0.03663	0.0457875	0.043956
Cotesia_saltatoria|WOMIA159-11|United_Kingdom	0.0609319	0.0704607	0.0698925	0.0770609	0.0734767	0.016129	0.0501792	0.0609319	0.0698925	0.0740072	0.0340502	0.056	0.0591398	0.062724	0.0591398	0.0271003	0.0591398	0.0770609	0.0730994	0.0581395	0.0706215	0.0286738	0.0949821	0.0758808	0.0663082	0.0591398	0.0591398	0.0750751	0.0716846	0.0770609	0.0394265	0.0573477	0.0591398	0.078853	0.0770609	0.0716846	0.0698925	0.0215054	0.0107527	0.0376344	0.0155039	0.0663082	0.0750751	0.0698925	0.0706215	0.0555556	0.0394265	0.0483871	0.046595
Cotesia_selenevora|CNCBR641-09|Sweden	0.0430108	0.0948509	0.0913978	0.100358	0.09319	0.0645161	0.0663082	0.046595	0.0949821	0.0956679	0.062724	0.0693333	0.0412186	0.078853	0.0752688	0.0704607	0.0716846	0.09319	0.0409357	0.0271318	0.039548	0.0663082	0.123656	0.0542005	0.0806452	0.0448029	0.0448029	0.0960961	0.0842294	0.0824373	0.0645161	0.0340502	0.0430108	0.0878136	0.0842294	0.0913978	0.0896057	0.0698925	0.062724	0.0663082	0.0600775	0.0430108	0.0960961	0.0376344	0.0310734	0.0734767	0.0716846	0.0555556	0.0537634
Cotesia_sericea|BCHYM7193-15|Czech_Republic	0.0573477	0.0677507	0.0752688	0.0824373	0.078853	0.0376344	0.0537634	0.0591398	0.078853	0.0758123	0.0358423	0.064	0.0591398	0.0734767	0.0663082	0.0460705	0.062724	0.0734767	0.0672515	0.0523256	0.0677966	0.0304659	0.105735	0.0785908	0.0698925	0.0573477	0.0573477	0.0660661	0.0681004	0.0716846	0.0340502	0.0537634	0.0591398	0.0716846	0.0913978	0.0752688	0.0734767	0.0412186	0.0322581	0.0358423	0.0329457	0.0645161	0.0660661	0.0663082	0.0649718	0.062724	0.046595	0.0501792	0.0483871
Cotesia_sesamiae|KINS459-10|Kenya	0.078853	0.0867209	0.0878136	0.0896057	0.0878136	0.0645161	0.0752688	0.0806452	0.0860215	0.0920578	0.0663082	0.0293333	0.0770609	0.0412186	0.0412186	0.0704607	0.0376344	0.0860215	0.0818713	0.0794574	0.0819209	0.062724	0.09319	0.0921409	0.0376344	0.0770609	0.0752688	0.0930931	0.0860215	0.0860215	0.0698925	0.0770609	0.0734767	0.0842294	0.0734767	0.0896057	0.0878136	0.0663082	0.0591398	0.0663082	0.0639535	0.078853	0.0930931	0.078853	0.0819209	0.0430108	0.0752688	0.0734767	0.0716846
Cotesia_sesamiae|KINS471-10|Kenya	0.0824373	0.0867209	0.0949821	0.0967742	0.0913978	0.0663082	0.0752688	0.0806452	0.0860215	0.0920578	0.0716846	0.0266667	0.0806452	0.0430108	0.0430108	0.0731707	0.0483871	0.0896057	0.0847953	0.0813953	0.079096	0.0645161	0.0967742	0.0894309	0.0430108	0.078853	0.0770609	0.0810811	0.0913978	0.0860215	0.0734767	0.0806452	0.0770609	0.0860215	0.078853	0.0842294	0.0824373	0.0716846	0.0609319	0.0734767	0.0658915	0.0842294	0.0810811	0.0842294	0.0847458	0.0430108	0.0806452	0.0770609	0.0752688
Cotesia_sibyllarum|ASQAS173-11|Spain	0.0550285	0.0951087	0.0948767	0.104364	0.0967742	0.0721063	0.0721063	0.0550285	0.0910816	0.0898662	0.0683112	0.0668449	0.0512334	0.0759013	0.0721063	0.0788043	0.0777989	0.0834915	0.0526316	0.0411523	0.0509915	0.0683112	0.12334	0.0625	0.0740038	0.0531309	0.0531309	0.0933735	0.0815939	0.085389	0.0626186	0.0417457	0.0493359	0.0834915	0.0929791	0.0777989	0.0759013	0.0796964	0.0721063	0.0702087	0.0720165	0.0588235	0.0933735	0.0512334	0.0509915	0.0683112	0.0740038	0.0607211	0.0607211
Cotesia_smerinthi|HYCNE519-11|Canada	0.0430108	0.0840108	0.0824373	0.0913978	0.0842294	0.0716846	0.0537634	0.0483871	0.0913978	0.0884477	0.0573477	0.0666667	0.0448029	0.0770609	0.0734767	0.0867209	0.0752688	0.0878136	0.0584795	0.0426357	0.0480226	0.062724	0.111111	0.0596206	0.0734767	0.046595	0.046595	0.0960961	0.0824373	0.0752688	0.0591398	0.0448029	0.0483871	0.0860215	0.0842294	0.0860215	0.0842294	0.0734767	0.0663082	0.0663082	0.0639535	0.0501792	0.0960961	0.0483871	0.0508475	0.0716846	0.0716846	0.0448029	0.0430108
Cotesia_specularis|WOMIA124-11|Spain	0.0663082	0.0650407	0.0734767	0.0824373	0.0770609	0.0412186	0.0537634	0.0681004	0.0770609	0.0740072	0.0322581	0.0586667	0.062724	0.0770609	0.0734767	0.0433604	0.0681004	0.0716846	0.0760234	0.0639535	0.0677966	0.0376344	0.0878136	0.0758808	0.0752688	0.0645161	0.0645161	0.0720721	0.0663082	0.0770609	0.0322581	0.0591398	0.0681004	0.0734767	0.0698925	0.0645161	0.062724	0.046595	0.0358423	0.0430108	0.0387597	0.0681004	0.0720721	0.0716846	0.0677966	0.0681004	0.00179211	0.0555556	0.0537634
Cotesia_spuria|BCHYM7179-15|Czech_Republic	0.0448029	0.0921409	0.0842294	0.0913978	0.0878136	0.0609319	0.0663082	0.046595	0.0842294	0.0884477	0.062724	0.0746667	0.0394265	0.0860215	0.0824373	0.0758808	0.0698925	0.0842294	0.0350877	0.0213178	0.0282486	0.0609319	0.112903	0.0623306	0.0806452	0.0448029	0.0448029	0.0900901	0.0824373	0.0824373	0.0573477	0.0394265	0.0304659	0.0878136	0.0860215	0.0824373	0.0806452	0.0698925	0.062724	0.0573477	0.0600775	0.0448029	0.0900901	0.0394265	0.0310734	0.0734767	0.0698925	0.0555556	0.0537634
Cotesia_telengai|CGBTA403-08|Turkey	0.0770609	0.0840108	0.0878136	0.0842294	0.0806452	0.0663082	0.0734767	0.0824373	0.0967742	0.104693	0.0716846	0.0586667	0.0842294	0.0698925	0.0698925	0.0704607	0.0483871	0.0967742	0.0906433	0.0755814	0.0847458	0.0645161	0.100358	0.105691	0.0609319	0.0806452	0.078853	0.0870871	0.078853	0.0770609	0.0663082	0.078853	0.0716846	0.0824373	0.0734767	0.0896057	0.0878136	0.0681004	0.0573477	0.0681004	0.0639535	0.0860215	0.0870871	0.0842294	0.0875706	0.0501792	0.0752688	0.0698925	0.0681004
Cotesia_tenebrosa|CGBTB713-09|Turkey	0.0770609	0.0731707	0.0824373	0.0913978	0.0860215	0.0573477	0.0501792	0.0752688	0.0878136	0.0866426	0.0483871	0.072	0.0752688	0.0734767	0.0698925	0.0704607	0.0734767	0.0806452	0.0877193	0.0639535	0.0847458	0.0430108	0.109319	0.0948509	0.0806452	0.0734767	0.0734767	0.0840841	0.0663082	0.0770609	0.0430108	0.0734767	0.0770609	0.0734767	0.09319	0.078853	0.0770609	0.0663082	0.0555556	0.046595	0.0503876	0.0716846	0.0840841	0.0824373	0.0903955	0.0645161	0.0501792	0.0663082	0.0645161
Cotesia_tetricus|ASQSR267-11|Austria	0.0824373	0.0785908	0.0716846	0.0716846	0.0752688	0.0698925	0.0555556	0.0716846	0.0716846	0.0703971	0.0609319	0.0853333	0.0698925	0.0806452	0.0806452	0.0894309	0.0770609	0.0824373	0.0906433	0.0678295	0.0903955	0.062724	0.0878136	0.111111	0.0752688	0.0716846	0.0716846	0.0870871	0.0734767	0.0770609	0.0591398	0.0734767	0.0752688	0.0806452	0.0878136	0.0913978	0.0896057	0.0752688	0.0645161	0.0663082	0.0639535	0.0752688	0.0870871	0.0806452	0.0932203	0.0716846	0.0698925	0.0734767	0.0716846
Cotesia_tibialis|ASQSR255-11|Austria	0.078853	0.0569106	0.0913978	0.0985663	0.0896057	0.0698925	0.0806452	0.0913978	0.0842294	0.0956679	0.0663082	0.0826667	0.0860215	0.0878136	0.0842294	0.0840108	0.0806452	0.0322581	0.0994152	0.0717054	0.0960452	0.0645161	0.0985663	0.113821	0.0860215	0.0878136	0.0878136	0.045045	0.0483871	0.0770609	0.0573477	0.0824373	0.0806452	0.0483871	0.100358	0.0519713	0.0501792	0.0752688	0.0663082	0.0698925	0.0678295	0.0896057	0.045045	0.0860215	0.0960452	0.0752688	0.0698925	0.0734767	0.0752688
Cotesia_urabae|NZHYM611-10|New_Zealand	0.0770609	0.0785908	0.100358	0.0985663	0.103943	0.0734767	0.0734767	0.0734767	0.0985663	0.0920578	0.0681004	0.0693333	0.0663082	0.0681004	0.0663082	0.0785908	0.0681004	0.0913978	0.0760234	0.0697674	0.0649718	0.0716846	0.109319	0.0813008	0.0698925	0.0716846	0.0716846	0.0900901	0.0878136	0.0878136	0.0681004	0.062724	0.0716846	0.0949821	0.0752688	0.09319	0.0913978	0.078853	0.0681004	0.0734767	0.0678295	0.0860215	0.0900901	0.0663082	0.0649718	0.062724	0.0770609	0.0770609	0.0752688
Cotesia_vanessae|WOMIA097-11|Spain	0.107527	0.0948509	0.105735	0.102151	0.103943	0.0913978	0.0985663	0.114695	0.0949821	0.106498	0.0878136	0.106667	0.103943	0.0985663	0.0949821	0.108401	0.0878136	0.0716846	0.122807	0.0949612	0.124294	0.0824373	0.109319	0.149051	0.0842294	0.112903	0.109319	0.102102	0.078853	0.100358	0.0896057	0.0967742	0.102151	0.0806452	0.103943	0.0770609	0.0752688	0.09319	0.0878136	0.0949821	0.0872093	0.11828	0.102102	0.107527	0.127119	0.0949821	0.0949821	0.100358	0.102151
Cotesia_vestalis|GBMIN74199-17|	0.0644567	0.0847458	0.092081	0.0939227	0.0883978	0.0552486	0.0626151	0.0662983	0.0847145	0.0909091	0.0607735	0.0222222	0.0718232	0.0405157	0.0368324	0.0564972	0.0202578	0.0810313	0.0769231	0.0658915	0.0707965	0.0515654	0.0994475	0.0932203	0.038674	0.0644567	0.0644567	0.0786164	0.0828729	0.0773481	0.0626151	0.0718232	0.0644567	0.0791897	0.0644567	0.0736648	0.0718232	0.0570902	0.0497238	0.0607735	0.0542636	0.0736648	0.0786164	0.0736648	0.0766962	0.0257827	0.0662983	0.0644567	0.0626151
Cotesia_xylina|CNCHY039-07|Canada	0.0806452	0.0569106	0.0878136	0.0967742	0.0878136	0.0681004	0.0806452	0.0896057	0.0860215	0.0956679	0.0681004	0.08	0.0824373	0.0860215	0.0824373	0.0813008	0.0770609	0.0376344	0.0964912	0.0678295	0.0932203	0.062724	0.0949821	0.113821	0.0878136	0.0860215	0.0860215	0.048048	0.0483871	0.0734767	0.0555556	0.0806452	0.0770609	0.046595	0.0985663	0.0519713	0.0501792	0.0734767	0.0645161	0.0681004	0.0658915	0.0860215	0.048048	0.0824373	0.0932203	0.0734767	0.0645161	0.0734767	0.0752688
Cotesia_yakutatensis|ASWAS034-07|Canada	0.0716846	0.0406504	0.0896057	0.09319	0.0878136	0.0698925	0.0716846	0.0842294	0.0860215	0.0920578	0.0645161	0.0666667	0.0734767	0.078853	0.0752688	0.0704607	0.0698925	0.0412186	0.0789474	0.0658915	0.0734463	0.0591398	0.0967742	0.0894309	0.0752688	0.0806452	0.0806452	0.027027	0.0412186	0.0716846	0.0483871	0.0716846	0.0681004	0.0376344	0.0913978	0.0430108	0.0412186	0.0752688	0.0645161	0.0591398	0.0697674	0.0860215	0.027027	0.0734767	0.0734463	0.0645161	0.0645161	0.0698925	0.0716846
Cotesia_yakutatensis|SSBAF2139-13|Canada	0.0734767	0.0514905	0.0949821	0.0949821	0.0878136	0.0698925	0.078853	0.0842294	0.0824373	0.0866426	0.0609319	0.0666667	0.0770609	0.0752688	0.0752688	0.0731707	0.0770609	0.0501792	0.0818713	0.0755814	0.0762712	0.0555556	0.107527	0.0921409	0.0770609	0.0824373	0.0824373	0.042042	0.0537634	0.0806452	0.0591398	0.0681004	0.0734767	0.0519713	0.0896057	0.0232975	0.0215054	0.0752688	0.0645161	0.0663082	0.0717054	0.0878136	0.042042	0.0806452	0.079096	0.0681004	0.0609319	0.0663082	0.0681004
Cotesia_zygaenarum|CNCBR611-09|Sweden	0.0394265	0.0867209	0.0806452	0.0878136	0.0878136	0.0591398	0.0591398	0.0376344	0.0842294	0.0884477	0.0609319	0.0693333	0.0304659	0.0806452	0.0770609	0.0650407	0.0716846	0.0842294	0.0233918	0.0116279	0.0169492	0.0591398	0.116487	0.0514905	0.078853	0.0358423	0.0394265	0.0900901	0.0806452	0.0734767	0.0537634	0.0322581	0.0250896	0.0860215	0.0842294	0.0842294	0.0824373	0.0645161	0.0573477	0.0573477	0.0542636	0.0430108	0.0900901	0.0268817	0.0254237	0.0716846	0.0681004	0.0501792	0.0483871
Parapanteles_continua|Hylesia_continua|ASBAC280-05|Costa_Rica	0.0806452	0.0867209	0.102151	0.102151	0.100358	0.09319	0.0913978	0.0896057	0.0985663	0.104693	0.0949821	0.104	0.0824373	0.0913978	0.0913978	0.097561	0.100358	0.0949821	0.0935673	0.0910853	0.0819209	0.0824373	0.102151	0.105691	0.0913978	0.0878136	0.0878136	0.0870871	0.09319	0.0806452	0.0896057	0.0806452	0.0860215	0.09319	0.121864	0.0806452	0.078853	0.0913978	0.0878136	0.0896057	0.0910853	0.0949821	0.0870871	0.0967742	0.0903955	0.102151	0.102151	0.0913978	0.0896057
Parapanteles_em|Hemiceras_conspirata|ASBA316-06|Costa_Rica	0.11828	0.102981	0.116487	0.112903	0.11828	0.121864	0.11828	0.123656	0.120072	0.131769	0.114695	0.136	0.112903	0.121864	0.123656	0.124661	0.120072	0.123656	0.119883	0.125969	0.115819	0.11828	0.130824	0.132791	0.120072	0.121864	0.123656	0.129129	0.114695	0.109319	0.125448	0.114695	0.125448	0.130824	0.12724	0.120072	0.11828	0.120072	0.112903	0.121864	0.118217	0.120072	0.129129	0.129032	0.118644	0.11828	0.123656	0.123656	0.121864
Parapanteles_gerontogeae|Paratype|HYCNE1748-11|South_Africa	0.0896947	0.0758808	0.0858779	0.0896947	0.0820611	0.0782443	0.0744275	0.0896947	0.0763359	0.0788462	0.0858779	0.088	0.0763359	0.0896947	0.0858779	0.0867209	0.0877863	0.0801527	0.0935673	0.0892116	0.0875706	0.0763359	0.0973282	0.097561	0.0916031	0.0877863	0.0896947	0.0990991	0.0782443	0.0687023	0.0858779	0.0782443	0.0839695	0.0916031	0.0916031	0.0896947	0.0877863	0.0801527	0.0744275	0.0877863	0.0809129	0.0763359	0.0990991	0.0916031	0.0847458	0.0839695	0.0801527	0.0820611	0.0820611
Parapanteles_mariae|Euglyphis_maria|ASHYD969-08|Costa_Rica	0.0448029	0.0894309	0.0806452	0.0913978	0.0913978	0.0609319	0.0663082	0.046595	0.0949821	0.0884477	0.062724	0.0666667	0.0286738	0.0806452	0.0770609	0.0596206	0.0734767	0.078853	0.0292398	0.0290698	0.0225989	0.0645161	0.112903	0.0542005	0.0806452	0.0448029	0.0448029	0.0930931	0.0878136	0.078853	0.0609319	0.0340502	0.0286738	0.0949821	0.0752688	0.0824373	0.0806452	0.0555556	0.0519713	0.0663082	0.0562016	0.0519713	0.0930931	0.0322581	0.0254237	0.0770609	0.0663082	0.0555556	0.0537634
Parapanteles_paradoxusDHJ02|Tithraustes_noctilucesICG02|ASBAC133-05|Costa_Rica	0.105735	0.100271	0.102151	0.09319	0.103943	0.107527	0.0949821	0.112903	0.0967742	0.106498	0.103943	0.12	0.0985663	0.0949821	0.0949821	0.116531	0.100358	0.105735	0.119883	0.108527	0.110169	0.09319	0.116487	0.116531	0.0985663	0.111111	0.111111	0.111111	0.100358	0.0752688	0.0985663	0.102151	0.107527	0.102151	0.102151	0.0949821	0.09319	0.105735	0.102151	0.103943	0.104651	0.0949821	0.111111	0.109319	0.121469	0.103943	0.105735	0.102151	0.100358
Parapanteles_paradoxusDHJ03|Dunama_janecoxae|ASBAC387-05|Costa_Rica	0.0842294	0.0921409	0.0949821	0.107527	0.0949821	0.0878136	0.0860215	0.0878136	0.0967742	0.102888	0.0824373	0.101333	0.078853	0.0967742	0.09319	0.0948509	0.0967742	0.102151	0.0994152	0.0813953	0.0932203	0.0770609	0.121864	0.100271	0.0967742	0.0860215	0.0860215	0.0960961	0.0878136	0.0716846	0.0806452	0.0770609	0.0842294	0.0896057	0.111111	0.0913978	0.0896057	0.0896057	0.0824373	0.078853	0.0872093	0.0752688	0.0960961	0.0896057	0.0932203	0.0949821	0.102151	0.0878136	0.0860215
Parapanteles_polus|Napata_lelex|ASBR070-06|Costa_Rica	0.0448029	0.0840108	0.0896057	0.0967742	0.0913978	0.062724	0.062724	0.0519713	0.0967742	0.0938628	0.0645161	0.0693333	0.0340502	0.0806452	0.0770609	0.0704607	0.0716846	0.0842294	0.0380117	0.0348837	0.0254237	0.0698925	0.116487	0.0623306	0.0734767	0.0501792	0.0501792	0.0960961	0.0770609	0.078853	0.0663082	0.0394265	0.0340502	0.0878136	0.078853	0.0770609	0.0752688	0.0645161	0.0573477	0.0716846	0.0581395	0.0555556	0.0960961	0.0412186	0.0225989	0.0752688	0.0716846	0.0537634	0.0555556
Parapanteles_scotti|Ctenoplusia_oxygramma|ASBAC228-05|Costa_Rica	0.0537634	0.0867209	0.0734767	0.0878136	0.0770609	0.0537634	0.0555556	0.0483871	0.0878136	0.0776173	0.0448029	0.0506667	0.0519713	0.0716846	0.0681004	0.0542005	0.0698925	0.0878136	0.0614035	0.0503876	0.059322	0.046595	0.111111	0.0569106	0.0698925	0.046595	0.046595	0.102102	0.0896057	0.0842294	0.0501792	0.046595	0.0519713	0.100358	0.0860215	0.0896057	0.0878136	0.0555556	0.0483871	0.0537634	0.0484496	0.0537634	0.102102	0.0555556	0.0508475	0.0716846	0.0555556	0.0430108	0.0412186
Parapanteles_scotti|Spodoptera_androgea|ASBA637-06|Costa_Rica	0.0539568	0.0867209	0.0719424	0.0899281	0.0755396	0.0557554	0.0557554	0.0503597	0.0881295	0.0778986	0.0467626	0.0506667	0.0539568	0.0719424	0.0683453	0.0542005	0.0719424	0.0881295	0.0614035	0.0505837	0.059322	0.0485612	0.109712	0.0569106	0.0719424	0.0485612	0.0485612	0.102102	0.0881295	0.0845324	0.0485612	0.0485612	0.0539568	0.100719	0.0863309	0.0881295	0.0863309	0.057554	0.0503597	0.0557554	0.0505837	0.0557554	0.102102	0.057554	0.0508475	0.073741	0.0539568	0.044964	0.0431655
Parapanteles_sicpolus|Lonomia_concordia|ASBR060-06|Costa_Rica	0.0806452	0.0921409	0.0878136	0.09319	0.0878136	0.0878136	0.0896057	0.0949821	0.0985663	0.102888	0.0860215	0.106667	0.0842294	0.0967742	0.0967742	0.102981	0.0985663	0.103943	0.0877193	0.0891473	0.0847458	0.0878136	0.112903	0.102981	0.0896057	0.09319	0.09319	0.111111	0.0913978	0.0716846	0.0913978	0.0860215	0.0878136	0.102151	0.103943	0.09319	0.0913978	0.0896057	0.0824373	0.09319	0.0852713	0.0860215	0.111111	0.0985663	0.0903955	0.0967742	0.0949821	0.0824373	0.0806452
Parapanteles_tessares|Hylesia_continua|ASBAC368-05|Costa_Rica	0.0824373	0.0894309	0.0967742	0.0913978	0.0949821	0.0860215	0.0896057	0.0878136	0.0896057	0.102888	0.0913978	0.0986667	0.078853	0.0878136	0.0913978	0.0921409	0.0967742	0.09319	0.0935673	0.0891473	0.0932203	0.0842294	0.103943	0.102981	0.0842294	0.0860215	0.0860215	0.0930931	0.0913978	0.0824373	0.0878136	0.0806452	0.0878136	0.0913978	0.114695	0.0896057	0.0878136	0.0842294	0.0806452	0.0878136	0.0833333	0.09319	0.0930931	0.0967742	0.0932203	0.100358	0.102151	0.0896057	0.0878136
Cotesia_scotti|Spodoptera_cosmioides|MK239190|Brazil_GO_ES06	0.0555556	0.0867209	0.0752688	0.0878136	0.078853	0.0537634	0.0573477	0.0501792	0.0896057	0.0794224	0.0483871	0.056	0.0555556	0.0752688	0.0716846	0.0569106	0.0734767	0.0896057	0.0614035	0.0484496	0.059322	0.0483871	0.114695	0.0569106	0.0734767	0.0483871	0.0483871	0.102102	0.0878136	0.0860215	0.0519713	0.0501792	0.0537634	0.102151	0.0896057	0.0913978	0.0896057	0.0591398	0.0519713	0.0555556	0.0484496	0.0519713	0.102102	0.0591398	0.0536723	0.0734767	0.0555556	0.0448029	0.0430108
Cotesia_scotti|Spodoptera_cosmioides|MK239191|Brazil_GO_ES04	0.0555556	0.0867209	0.0752688	0.0878136	0.078853	0.0537634	0.0573477	0.0501792	0.0896057	0.0794224	0.0483871	0.056	0.0555556	0.0752688	0.0716846	0.0569106	0.0734767	0.0896057	0.0614035	0.0484496	0.059322	0.0483871	0.114695	0.0569106	0.0734767	0.0483871	0.0483871	0.102102	0.0878136	0.0860215	0.0519713	0.0501792	0.0537634	0.102151	0.0896057	0.0913978	0.0896057	0.0591398	0.0519713	0.0555556	0.0484496	0.0519713	0.102102	0.0591398	0.0536723	0.0734767	0.0555556	0.0448029	0.0430108
Cotesia_scotti|Spodoptera_cosmioides|MK239192|Brazil_GO_ES03	0.0555556	0.0867209	0.0752688	0.0878136	0.078853	0.0537634	0.0573477	0.0501792	0.0896057	0.0794224	0.0483871	0.056	0.0555556	0.0752688	0.0716846	0.0569106	0.0734767	0.0896057	0.0614035	0.0484496	0.059322	0.0483871	0.114695	0.0569106	0.0734767	0.0483871	0.0483871	0.102102	0.0878136	0.0860215	0.0519713	0.0501792	0.0537634	0.102151	0.0896057	0.0913978	0.0896057	0.0591398	0.0519713	0.0555556	0.0484496	0.0519713	0.102102	0.0591398	0.0536723	0.0734767	0.0555556	0.0448029	0.0430108
Cotesia_scotti|Spodoptera_cosmioides|MK239193|Brazil_GO_ES03	0.0555556	0.0867209	0.0752688	0.0878136	0.078853	0.0537634	0.0573477	0.0501792	0.0896057	0.0794224	0.0483871	0.056	0.0555556	0.0752688	0.0716846	0.0569106	0.0734767	0.0896057	0.0614035	0.0484496	0.059322	0.0483871	0.114695	0.0569106	0.0734767	0.0483871	0.0483871	0.102102	0.0878136	0.0860215	0.0519713	0.0501792	0.0537634	0.102151	0.0896057	0.0913978	0.0896057	0.0591398	0.0519713	0.0555556	0.0484496	0.0519713	0.102102	0.0591398	0.0536723	0.0734767	0.0555556	0.0448029	0.0430108
Cotesia_scotti|Spodoptera_cosmioides|MK239194|Brazil_GO_ES01	0.0555556	0.0867209	0.0752688	0.0878136	0.078853	0.0537634	0.0573477	0.0501792	0.0896057	0.0794224	0.0483871	0.056	0.0555556	0.0752688	0.0716846	0.0569106	0.0734767	0.0896057	0.0614035	0.0484496	0.059322	0.0483871	0.114695	0.0569106	0.0734767	0.0483871	0.0483871	0.102102	0.0878136	0.0860215	0.0519713	0.0501792	0.0537634	0.102151	0.0896057	0.0913978	0.0896057	0.0591398	0.0519713	0.0555556	0.0484496	0.0519713	0.102102	0.0591398	0.0536723	0.0734767	0.0555556	0.0448029	0.0430108
Cotesia_scotti|Spodoptera_eridania|MK239195|Brazil_PR	0.0537634	0.0867209	0.0734767	0.0860215	0.0770609	0.0519713	0.0555556	0.0483871	0.0878136	0.0776173	0.046595	0.056	0.0537634	0.0734767	0.0698925	0.0569106	0.0716846	0.0878136	0.0614035	0.0465116	0.059322	0.046595	0.112903	0.0569106	0.0716846	0.046595	0.046595	0.102102	0.0860215	0.0842294	0.0501792	0.0483871	0.0519713	0.100358	0.0878136	0.0896057	0.0878136	0.0573477	0.0501792	0.0537634	0.0465116	0.0501792	0.102102	0.0573477	0.0536723	0.0716846	0.0537634	0.0430108	0.0412186
Capitonius_Malaise2909|JIAAL038-16|	0.189687	0.183616	0.186004	0.186004	0.187845	0.186004	0.189687	0.184162	0.18232	0.191095	0.19337	0.2	0.189687	0.174954	0.176796	0.214689	0.178637	0.197053	0.195266	0.19186	0.188791	0.191529	0.198895	0.19209	0.173112	0.18232	0.18232	0.198113	0.178637	0.189687	0.184162	0.19337	0.180479	0.184162	0.191529	0.197053	0.195212	0.195212	0.186004	0.195212	0.187984	0.180479	0.198113	0.18232	0.185841	0.178637	0.195212	0.191529	0.189687
Cardiochiles|GMMCF101-14|	0.175627	0.146341	0.184588	0.166667	0.182796	0.170251	0.155914	0.166667	0.188172	0.176895	0.175627	0.146667	0.172043	0.164875	0.163082	0.165312	0.164875	0.172043	0.178363	0.174419	0.169492	0.170251	0.173835	0.173442	0.164875	0.168459	0.168459	0.159159	0.16129	0.175627	0.173835	0.173835	0.164875	0.166667	0.163082	0.166667	0.164875	0.175627	0.170251	0.175627	0.170543	0.172043	0.159159	0.172043	0.155367	0.164875	0.170251	0.170251	0.172043
Meteoridea|ASQSQ545-09|	0.189964	0.186992	0.191756	0.182796	0.193548	0.177419	0.182796	0.189964	0.175627	0.193141	0.181004	0.192	0.189964	0.188172	0.191756	0.176152	0.18638	0.189964	0.195906	0.187984	0.20339	0.179211	0.206093	0.205962	0.188172	0.188172	0.188172	0.189189	0.188172	0.182796	0.173835	0.188172	0.197133	0.182796	0.200717	0.193548	0.191756	0.177419	0.173835	0.181004	0.178295	0.181004	0.189189	0.189964	0.20339	0.177419	0.188172	0.188172	0.18638
Aspilodemon|GMHDN063-13|	0.157706	0.149051	0.168459	0.150538	0.170251	0.134409	0.146953	0.150538	0.16129	0.16787	0.136201	0.162667	0.139785	0.139785	0.137993	0.149051	0.137993	0.154122	0.172515	0.151163	0.169492	0.139785	0.157706	0.181572	0.154122	0.145161	0.146953	0.156156	0.145161	0.154122	0.148746	0.143369	0.150538	0.148746	0.154122	0.150538	0.148746	0.137993	0.134409	0.139785	0.137597	0.148746	0.156156	0.155914	0.161017	0.150538	0.150538	0.15233	0.150538
Ephedrus_incompletus|SSEIB11671-13|	0.181004	0.181572	0.181004	0.181004	0.182796	0.170251	0.177419	0.18638	0.184588	0.194946	0.175627	0.186667	0.175627	0.188172	0.188172	0.184282	0.175627	0.193548	0.195906	0.187984	0.189266	0.182796	0.202509	0.195122	0.184588	0.184588	0.184588	0.207207	0.188172	0.189964	0.184588	0.177419	0.18638	0.206093	0.182796	0.184588	0.182796	0.177419	0.170251	0.18638	0.172481	0.188172	0.207207	0.188172	0.189266	0.175627	0.168459	0.175627	0.177419
Notiospathius_mariachi|ASDOR018-09|	0.197133	0.200542	0.177419	0.177419	0.177419	0.18638	0.170251	0.193548	0.18638	0.1787	0.181004	0.213333	0.177419	0.188172	0.189964	0.219512	0.195341	0.202509	0.216374	0.197674	0.217514	0.184588	0.195341	0.214092	0.189964	0.189964	0.189964	0.24024	0.182796	0.188172	0.184588	0.184588	0.189964	0.191756	0.193548	0.198925	0.197133	0.18638	0.182796	0.191756	0.184109	0.179211	0.24024	0.191756	0.217514	0.197133	0.182796	0.184588	0.182796
[truncated: 64 more columns]

## Sheet: Caption
Table. Estimates of Evolutionary Divergence between Sequences
The number of base differences per site from between sequences are shown. This analysis involved 113 nucleotide sequences. Codon positions included were 1st+2nd+3rd+Noncoding. All ambiguous positions were removed for each sequence pair (pairwise deletion option). There were a total of 558 positions in the final dataset. Evolutionary analyses were conducted in MEGA X [1].
0
1. Kumar S., Stecher G., Li M., Knyaz C., and Tamura K. (2018). MEGA X: Molecular Evolutionary Genetics Analysis across computing platforms. Molecular Biology and Evolution 35:1547-1549.
Disclaimer: Although utmost care has been taken to ensure the correctness of the caption, the caption text is provided "as is" without any warranty of any kind. Authors advise the user to carefully check the caption prior to its use for any purpose and report any errors or problems to the authors immediately (www.megasoftware.net). In no event shall the authors and their employers be liable for a…
